# Supplementary material for: Serum protein layers on parylene-C and silicon oxide: Effect on cell adhesion
Source: PubMed Central journal article supplement (PMC4342411; doi:10.1016/j.colsurfb.2014.12.020), 2015-02-01

## Supplementary material

**Table S1.** Mass coverages of albumin adsorbed on SiO<sub>2</sub> and SiON (concentration of 0.1 mg/ml at pH 7).

| Surface material                                       | Mass (ng/mm <sup>2</sup> ) |
|--------------------------------------------------------|----------------------------|
| SiO <sub>2</sub>                                       | 1.51±0.05                  |
| SiON<br>89% SiO <sub>2</sub><br>11% of silicon nitride | 1.44±0.09                  |

**Table S2.** Protein layers characterization on parylene-C and SiON for Fn 50 µg/mL, albumin 5000 µg/mL and a mixture of Fn 50 µg/mL and albumin 5000 µg/mL in PBS at 20°C.

| Proteins                               | Parylene-C                 |                |                | SiON                       |                |                |
|----------------------------------------|----------------------------|----------------|----------------|----------------------------|----------------|----------------|
|                                        | Mass (ng/mm <sup>2</sup> ) | Thickness (nm) | Density (g/mL) | Mass (ng/mm <sup>2</sup> ) | Thickness (nm) | Density (g/mL) |
| <b>Maximum adsorption</b>              |                            |                |                |                            |                |                |
| <b>Fn</b>                              | 2.51±0.06                  | 3.2±0.2        | 0.79±0.05      | 2.06±0.04                  | 8.9±1.4        | 0.23±0.04      |
| <b>Albumin</b>                         | 1.5±0.1                    | 1.72±0.06      | 0.88±0.04      | 0.8±0.1                    | 4.3±0.6        | 0.20±0.05      |
| <b>Fn/Albumin</b>                      | 1.70±0.07                  | 1.9±0.1        | 0.91±0.08      | 1.9±0.1                    | 8.2±0.3        | 0.24±0.02      |
| <b>Post adsorption (5 min rinsing)</b> |                            |                |                |                            |                |                |
| <b>Fn</b>                              | 2.50±0.08                  | 3.1±0.2        | 0.81±0.05      | 1.89±0.03                  | 7.5±0.9        | 0.25±0.03      |
| <b>Albumin</b>                         | 1.5±0.1                    | 1.80±0.06      | 0.85±0.06      | 0.66±0.05                  | 3.2±0.6        | 0.21±0.04      |
| <b>Fn/Albumin</b>                      | 1.69±0.07                  | 1.89±0.07      | 0.90±0.05      | 1.7±0.1                    | 6.9±0.2        | 0.24±0.02      |

**Fig. S1.** AFM morphology analysis of silicon oxide surface before (A) and after (B) parylene-C coating). (B) Image of a scalpel blade incision in the deposited parylene-C layer. The silicon oxide surface underneath the parylene-C is revealed and the step between the two layers is measured at approximately 30 nm.

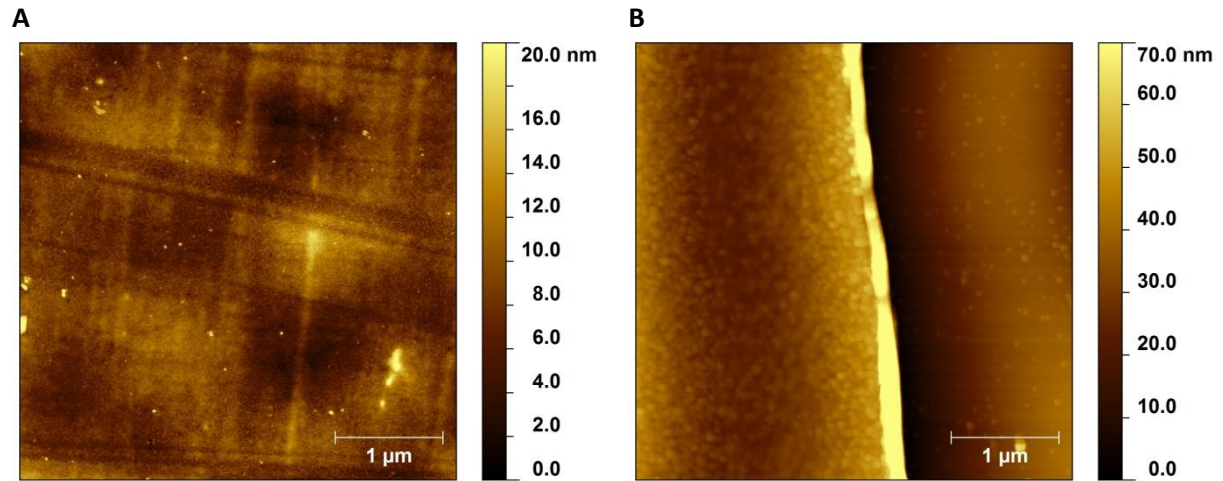

Supplement: mmc1.pdf [file mmc1.pdf]
